# Supplementary material for: Combination of the chemokine receptor type 2 (CCR2) antagonist DMX-200 and candesartan for COVID-19: a randomised controlled trial
Source: HighWire-hosted journal article supplement (doi:10.1136/bmjopen-2023-081790), 2024-10-01
Supplement: bmjopen-2023-081790supp004_data_supplement.pdf [file bmjopen-2023-081790supp004_data_supplement.pdf]

**CLARITY 2.0 Supplementary Appendix**

Table of Contents

***CLARITY 2.0 Trial Investigators..... 2***

***Figure S1: Candesartan titration algorithm ..... 2***

***Figure S2: Participant flow in the CLARITY 2.0 trial until assessment of primary outcome .. 3***

***Table S2: Modified World Health Organisation Clinical Progression Scale (WHO Scale) scores at Day 60, 90 and 180 in people with COVID-19 randomised to DMX-200, or placebo, on a background of candesartan therapy..... 4***

***Table S3: Adverse events among study participants..... 5***

## CLARITY 2.0 Trial Investigators

**Steering Committee:** Arlen Wilcox, Abhinav Bassi, Carol Pollock, Cheryl Jones, Greg J Fox, Louise M Burrell, Meg J Jardine, Sanjay D'Cruz, Sharifah Faridah Syed Omar, Thomas L Snelling, Vinay Rathore, Vivekanand Jha.

**Central Coordinating Committee:**

Meg J Jardine, Vivekanand Jha, Abhinav Bassi, Arlen Wilcox, Thomas L Snelling, Mark Jones, James Totterdell, Nikita Bathla, Katrina Diamante, Gerard Estivill Mercade, Rui Xie, Aishwarya Nair, Annelise Decaria, Nicola Abignano, Vinay Rathore, Atul Jindal, Sabah Siddiqui, Suprava Patel, Anjulata Sahu, Ashpak Bangi, Yasmeen Shaikh, Manish Kumar Jain, Madhavender Jain, Kapil Soni, Shivam R Kanje, Sanjeev Kumar Vimal, K. Kalyan Chakravarthy, P. Sathish Babu, Sanjay D'Cruz, Yuvraj Singh Cheema, Merlin Moni, Sivapriya G Nair, Sradha Kotwal.

**Drug Safety Monitoring Board:** Richard Haynes, Gagandeep Kang, Guy Thwaites, Natalie Staplin, Stephane Heritier

**Figure S1:** Candesartan titration algorithm

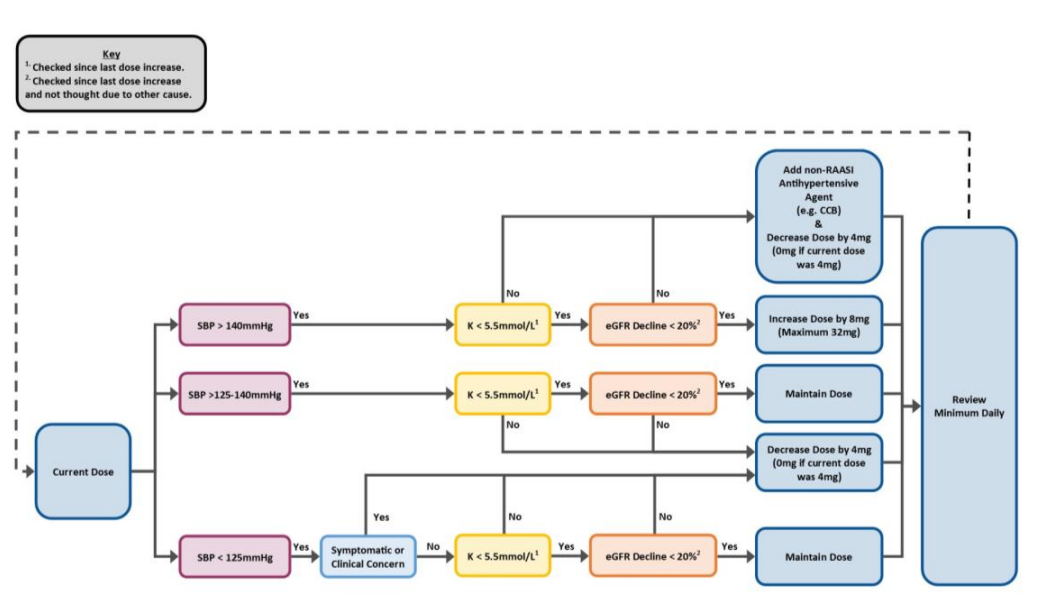

SBP, systolic blood pressure; K, serum potassium level; eGFR, estimated glomerular filtration rate; RAASI, renin angiotensin aldosterone system inhibitor; CCB, calcium channel blocker

**Figure S2:** Participant flow in the CLARITY 2.0 trial until assessment of primary outcome

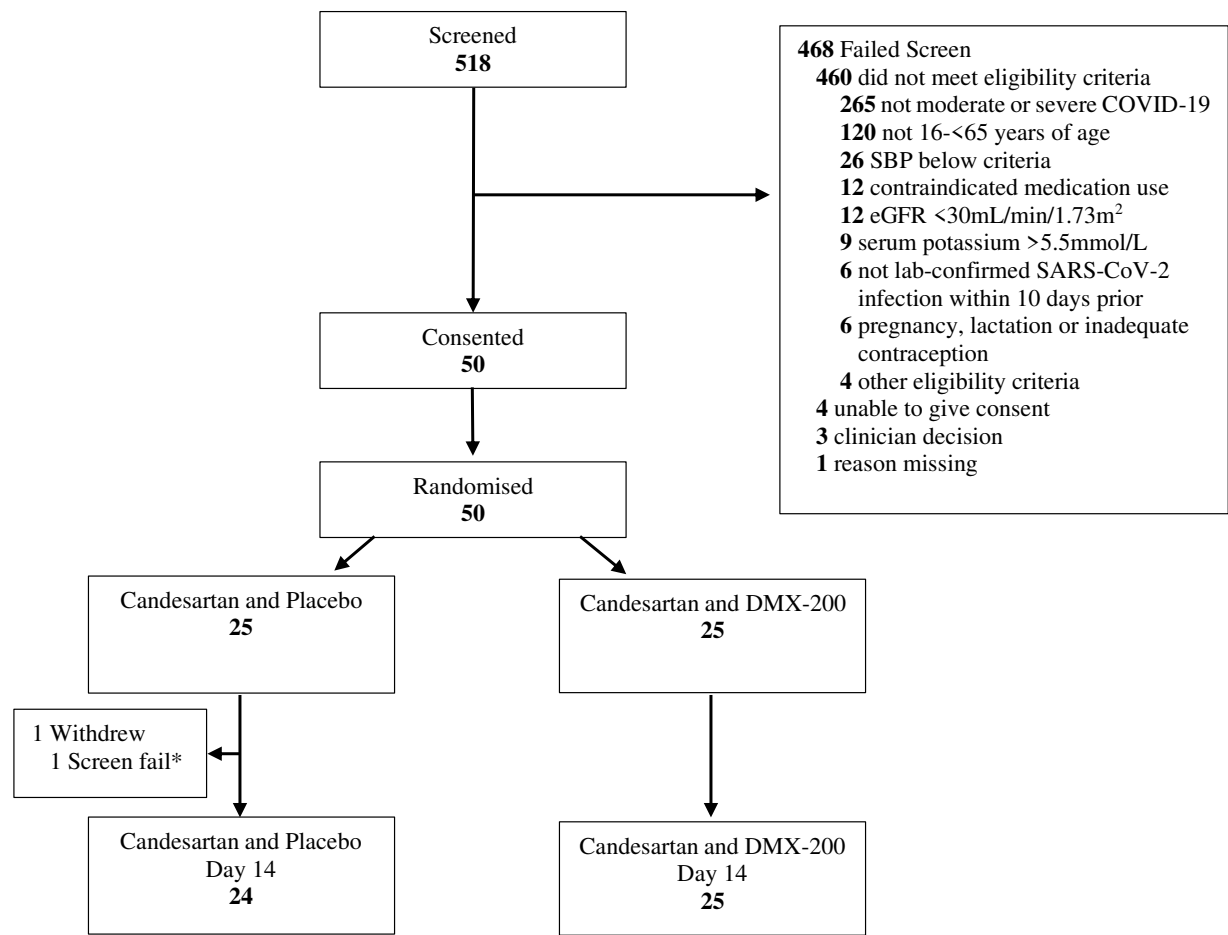

SBP = systolic blood pressure, eGFR = estimated glomerular filtration rate  
\* The single screen failure received no investigational medicine product and was not followed up.

Table S2: Modified World Health Organisation Clinical Progression Scale (WHO Scale) scores at Day 60, 90 and 180 in people with COVID-19 randomised to DMX-200, or placebo, on a background of candesartan therapy

| WHO Scale Score                                                                             | Statistic | At Day 60       |                 |               | At Day 90       |                 |               | At Day 180      |                 |               |
|---------------------------------------------------------------------------------------------|-----------|-----------------|-----------------|---------------|-----------------|-----------------|---------------|-----------------|-----------------|---------------|
|                                                                                             |           | DMX-200<br>n=25 | Placebo<br>n=25 | Total<br>n=49 | DMX-200<br>n=25 | Placebo<br>n=25 | Total<br>n=49 | DMX-200<br>n=25 | Placebo<br>n=25 | Total<br>n=49 |
| 1. Not hospitalised, no limitations on activities                                           | n (%)     | 21<br>(84)      | 22<br>(92)      | 43<br>(88)    | 24<br>(96)      | 22<br>(92)      | 46<br>(94)    | 23<br>(92)      | 23<br>(96)      | 46<br>(94)    |
| 2. Not hospitalised, limitation on activities                                               | n (%)     | 3<br>(12)       | 2<br>(8)        | 5<br>(10)     | 0<br>(0)        | 2<br>(8)        | 2<br>(4)      | 1<br>(4)        | 1<br>(4)        | 2<br>(4)      |
| 3. Hospitalised, not requiring supplemental oxygen                                          | n (%)     | 0<br>(0)        | 0<br>(0)        | 0<br>(0)      | 0<br>(0)        | 0<br>(0)        | 0<br>(0)      | 0<br>(0)        | 0<br>(0)        | 0<br>(0)      |
| 4. Hospitalised, requiring supplemental oxygen by mask or nasal prongs                      | n (%)     | 0<br>(0)        | 0<br>(0)        | 0<br>(0)      | 0<br>(0)        | 0<br>(0)        | 0<br>(0)      | 0<br>(0)        | 0<br>(0)        | 0<br>(0)      |
| 5. Hospitalised, on non-invasive ventilation or high-flow oxygen devices                    | n (%)     | 0<br>(0)        | 0<br>(0)        | 0<br>(0)      | 0<br>(0)        | 0<br>(0)        | 0<br>(0)      | 0<br>(0)        | 0<br>(0)        | 0<br>(0)      |
| 6. Hospitalised, requiring intubation and mechanical ventilation                            | n (%)     | 0<br>(0)        | 0<br>(0)        | 0<br>(0)      | 0<br>(0)        | 0<br>(0)        | 0<br>(0)      | 0<br>(0)        | 0<br>(0)        | 0<br>(0)      |
| 7. Hospitalised, on invasive mechanical ventilation and extracorporeal membrane oxygenation | n (%)     | 0<br>(0)        | 0<br>(0)        | 0<br>(0)      | 0<br>(0)        | 0<br>(0)        | 0<br>(0)      | 0<br>(0)        | 0<br>(0)        | 0<br>(0)      |
| 8. Death                                                                                    | n (%)     | 1<br>(4)        | 0<br>(0)        | 1<br>(2)      | 1<br>(4)        | 0<br>(0)        | 1<br>(2)      | 1<br>(4)        | 0<br>(0)        | 1<br>(2)      |

ARB = angiotensin receptor blocker

Table S3: Adverse events among study participants

| Adverse Event                       | DMX-200 and Candesartan | Placebo and Candesartan | Total |
|-------------------------------------|-------------------------|-------------------------|-------|
| Vertigo                             | 2                       |                         | 2     |
| Adult respiratory distress syndrome | 1                       |                         | 1     |
| Hypertension                        | 1                       |                         | 1     |
| Gastritis                           | 1                       |                         | 1     |
| Palpitations                        | 1                       | 1                       | 2     |
| Pneumonitis                         |                         | 1                       | 1     |
| Creatinine increased                |                         | 1                       | 1     |
| Vomiting                            |                         | 1                       | 1     |
| Fever                               |                         | 1                       | 1     |

None of the adverse events were classified as serious.
